# Supplementary material for: Solvent effects on extractant conformational energetics in liquid–liquid extraction: a simulation study of molecular solvents and ionic liquids
Source: Royal Society of Chemistry journal article supplement (doi:10.1039/d3cp04680j), 2023-12-04
Supplement: d3cp04680j1.pdf [file d3cp04680j1.pdf]

# Supporting Information: Solvent Effects on Extractant Conformational Energetics in Liquid-Liquid Extraction: A Simulation Study of Molecular Solvents and Ionic Liquids

Xiaoyu Wang,\* Srikanth Nayak, Richard E. Wilson, L. Soderholm, and Michael  
J. Servis\*

*Chemical Sciences and Engineering Division, Argonne National Laboratory, 9700 S Cass  
Ave, Lemont, IL 60439*

E-mail: [xiaoyu.wang@anl.gov](mailto:xiaoyu.wang@anl.gov); [mservis@anl.gov](mailto:mservis@anl.gov)

Table S1: Frequency of C=O stretching ( $\text{cm}^{-1}$ ) from literature and DFT (this work)

|                     | non-binding CMPO | binding CMPO | shift |
|---------------------|------------------|--------------|-------|
| DFT <sup>a</sup>    | 1659             | 1558         | 101   |
| Exptl. <sup>b</sup> | ~1640            | ~1600        | ~40   |

<sup>a</sup> DFT IR peaks are scaled by an empirical value of 0.95, which is suggested from <https://cccbdb.nist.gov/vibscalejust.asp>.

<sup>b</sup> From [Tkac et al.](#)'s work<sup>1</sup>

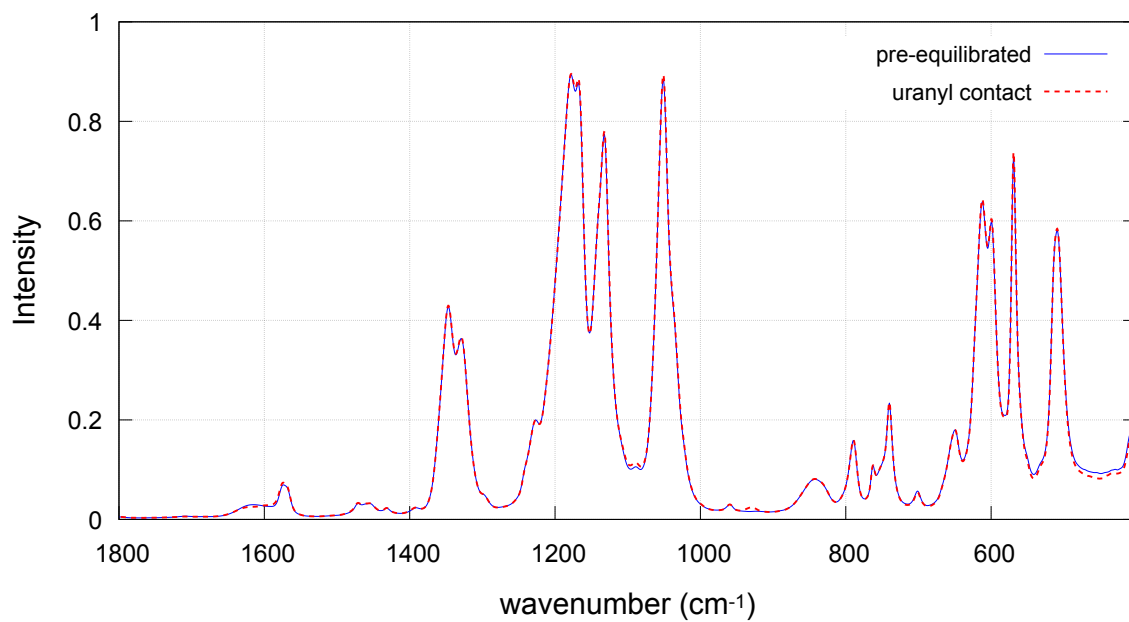

Figure S1: IR spectra for 0.1 M CMPO in [EMIM][Tf<sub>2</sub>N] for the pre-equilibrated organic phase (solid line) and uranyl-contacted organic phase (dashed line).

## Umbrella histograms

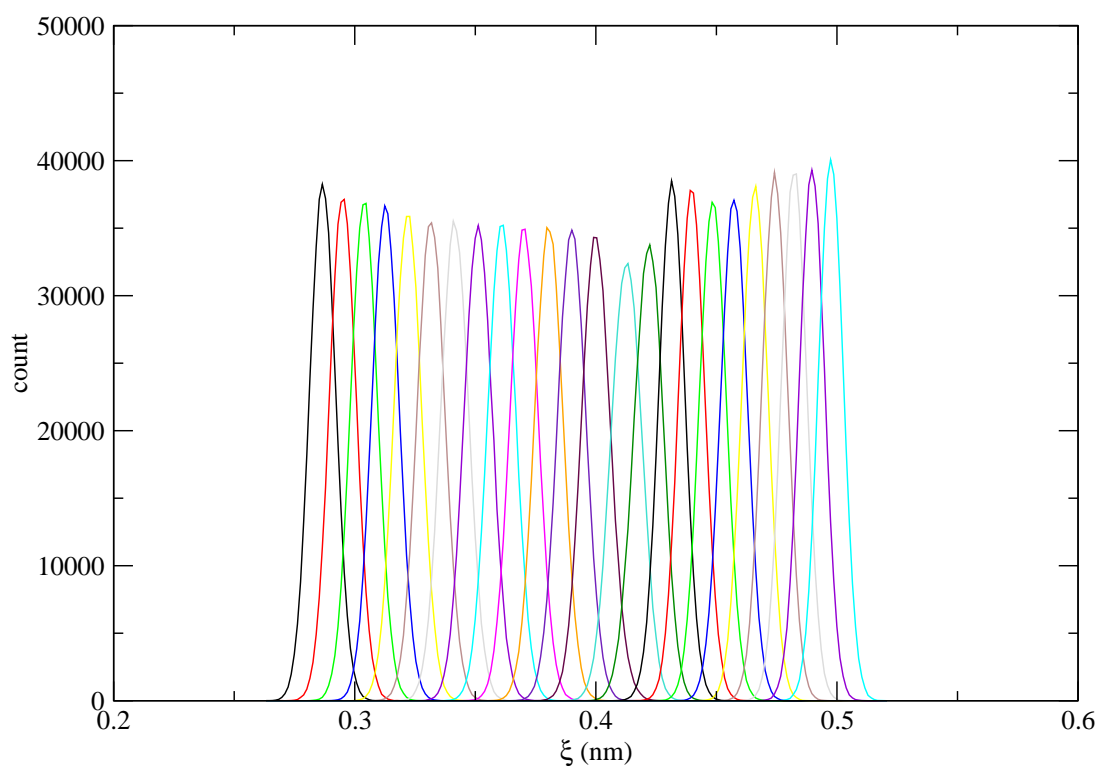

Figure S2: Histograms of the collective variable in vacuum, O(=P) to O(=C) distance ( $\text{\AA}$ ), in each window along the reaction coordinate.

## Umbrella histograms

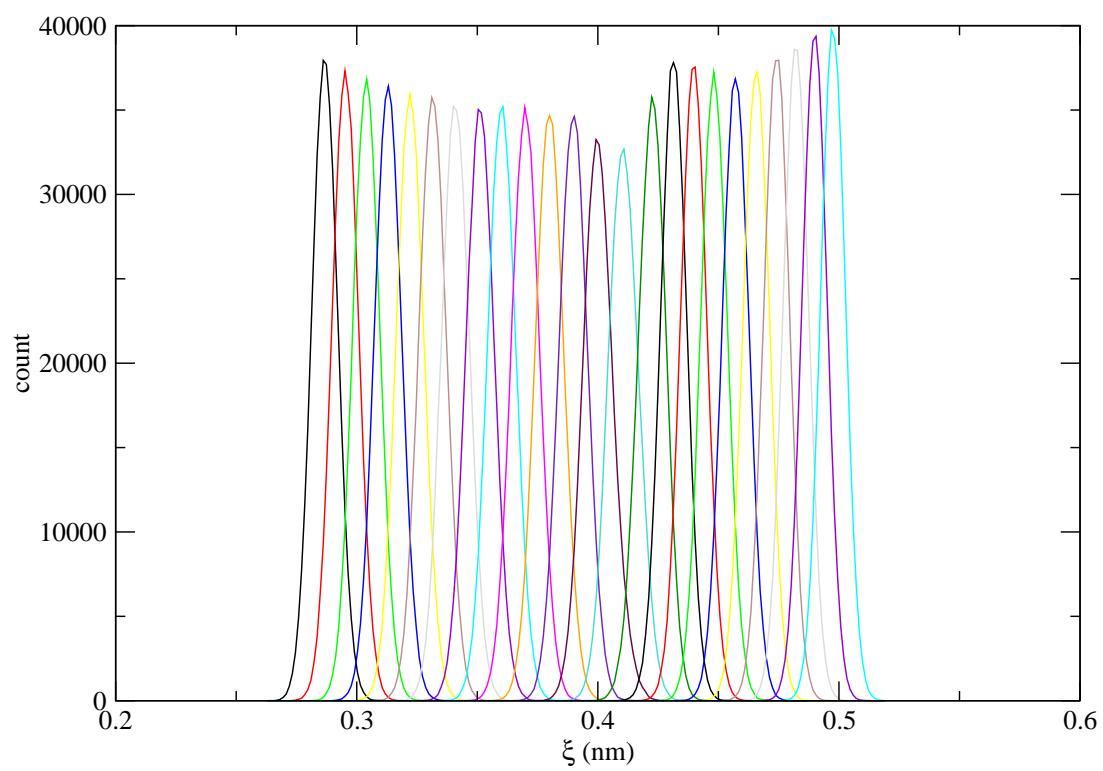

Figure S3: Histograms of the collective variable in dodecane, O(=P) to O(=C) distance ( $\text{\AA}$ ), in each window along the reaction coordinate.

## Umbrella histograms

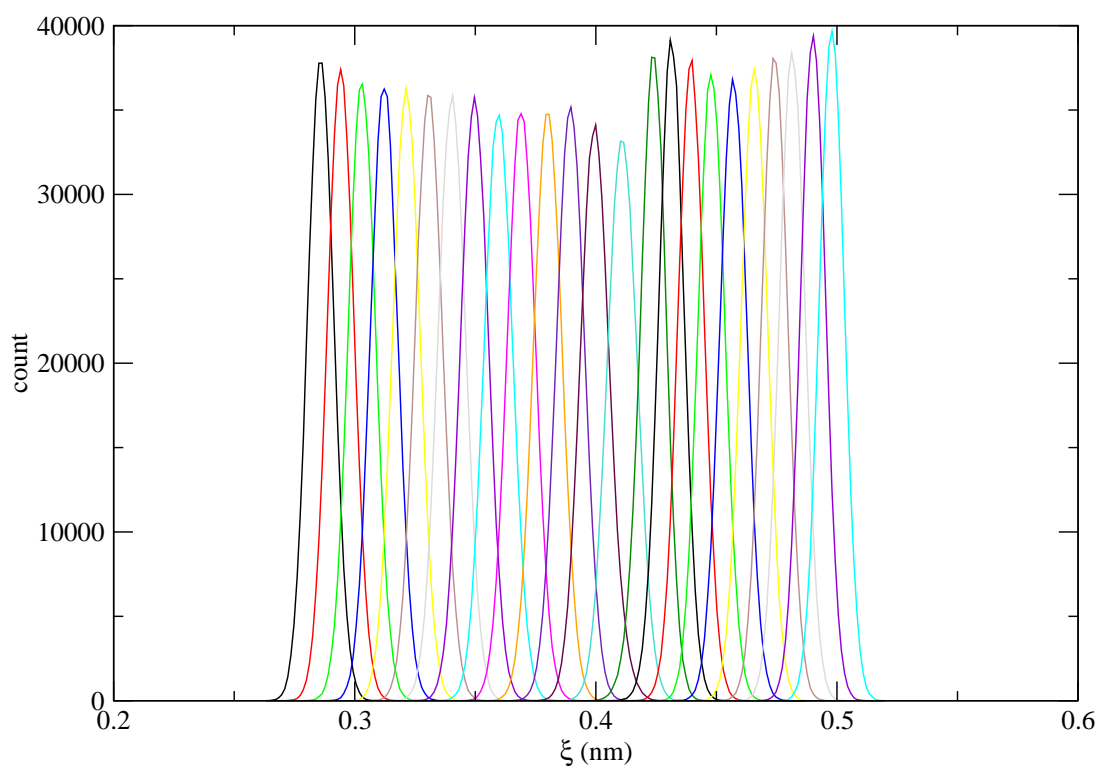

Figure S4: Histograms of the collective variable in TBP, O(=P) to O(=C) distance ( $\text{\AA}$ ), in each window along the reaction coordinate.

## Umbrella histograms

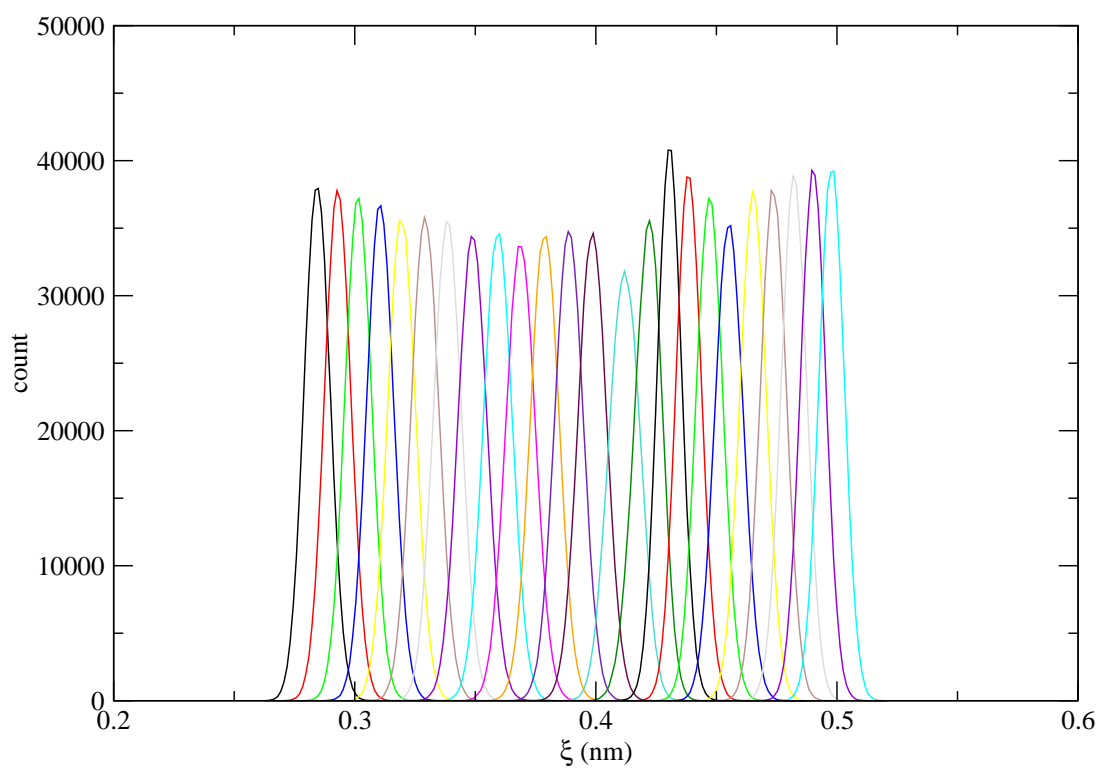

Figure S5: Histograms of the collective variable in dry IL, O(=P) to O(=C) distance ( $\text{\AA}$ ), in each window along the reaction coordinate.

## Umbrella histograms

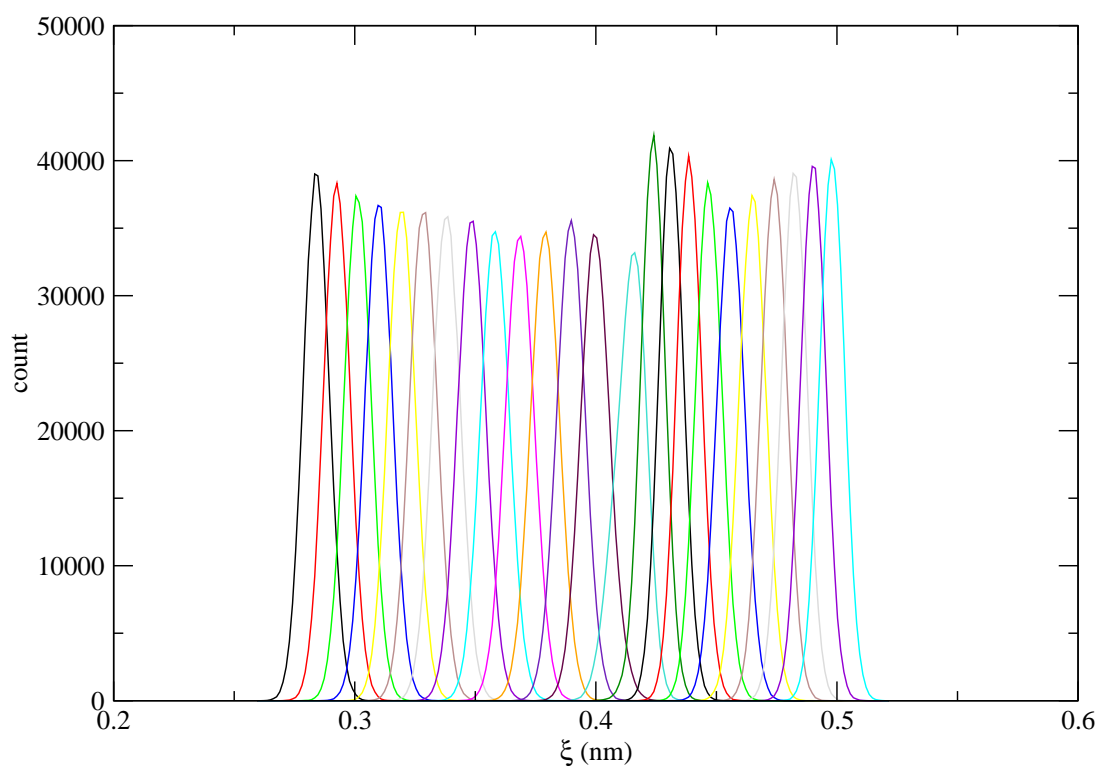

Figure S6: Histograms of the collective variable in wet IL, O(=P) to O(=C) distance ( $\text{\AA}$ ), in each window along the reaction coordinate.

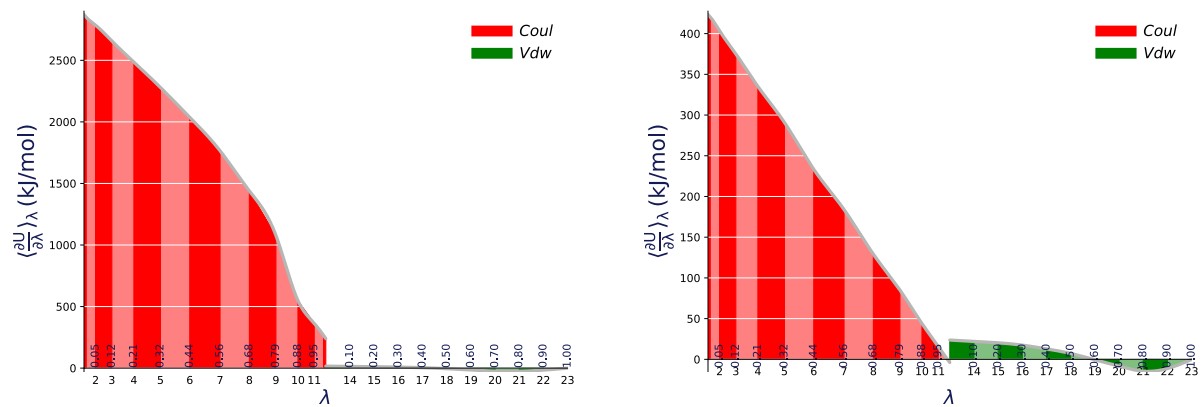

Figure S7:  $\langle \frac{\partial U(\lambda)}{\partial \lambda} \rangle_{\lambda_i}$  with respect to  $\lambda$  of uranyl (left panel) and nitrate (right panel) in the step (a): the annihilations of uranyl with *cis*-CMPO. Coulombic component is shown by red; VdW component is shown by green; the gray line is the fitted cubic profile in TI-CUBIC methodology.



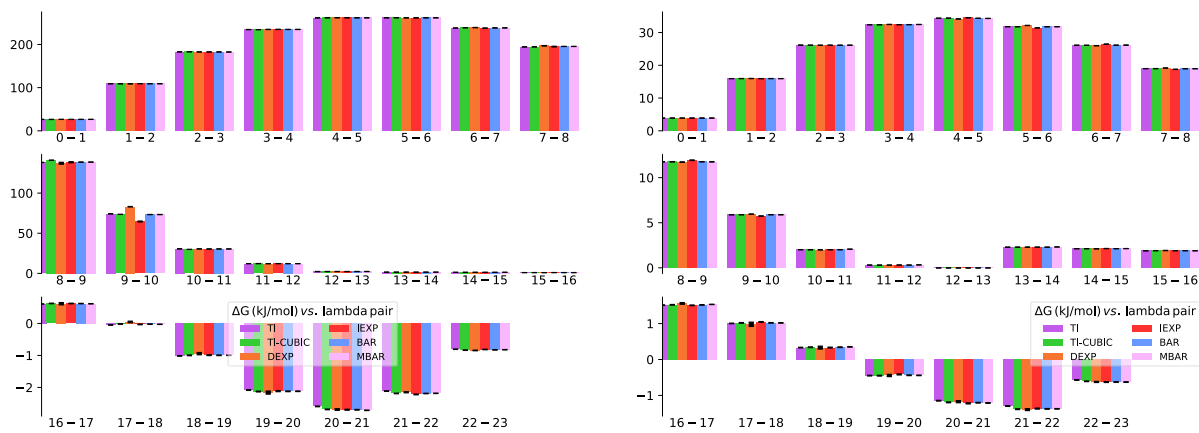

Figure S8:  $\Delta G$  with respect to each window during the annihilations of uranyl (left panel) and nitrate (right panel) in the step (a): the annihilations of uranyl with *cis*-CMPO.

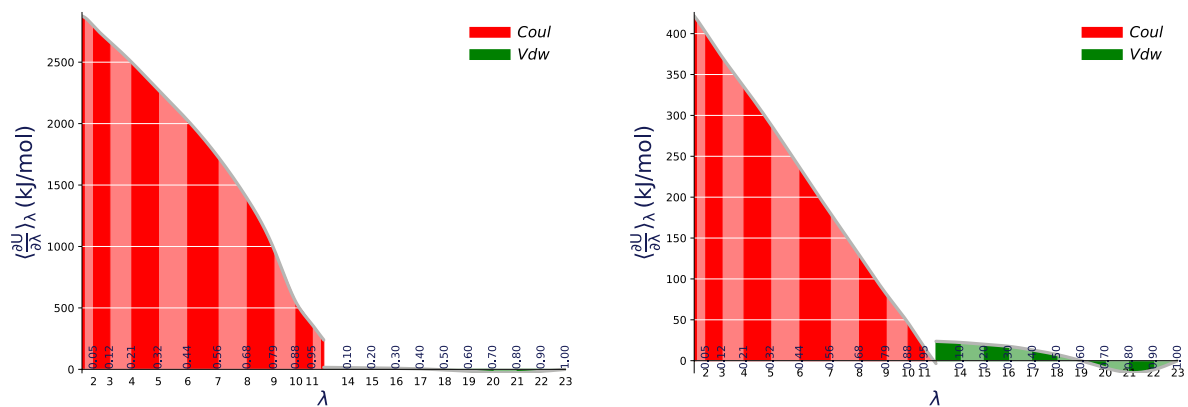

Figure S9:  $\langle (\frac{\partial U(\lambda)}{\partial \lambda}) \rangle_{\lambda_i}$  with respect to  $\lambda$  of uranyl (left panel) and nitrate (right panel) in the step (b): the annihilations of uranyl with free CMPO. Coulombic component is shown by red; VdW component is shown by green; the gray line is the fitted cubic profile in TI-CUBIC methodology.

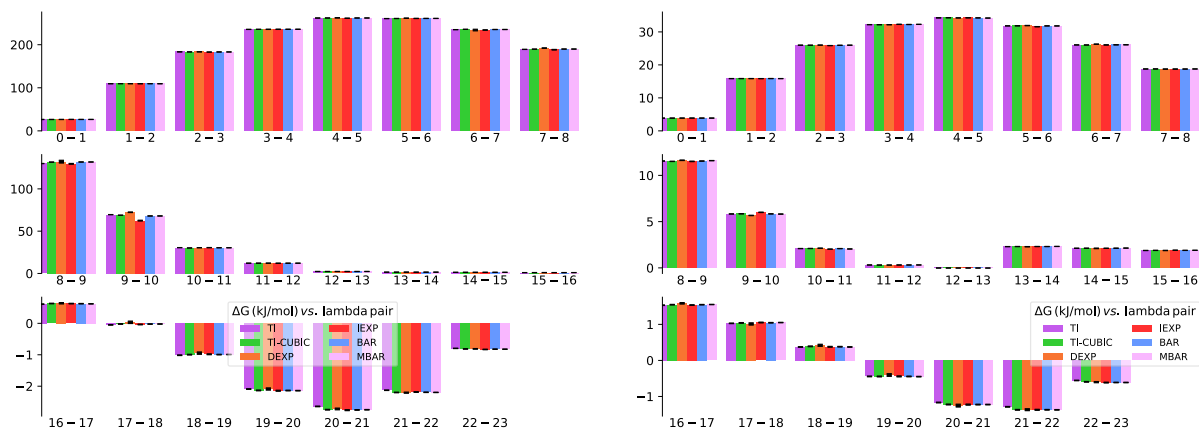

Figure S10:  $\Delta G$  with respect to each window during the annihilations of uranyl (left panel) and nitrate (right panel) in the step (b): the annihilations of uranyl with free CMPO.

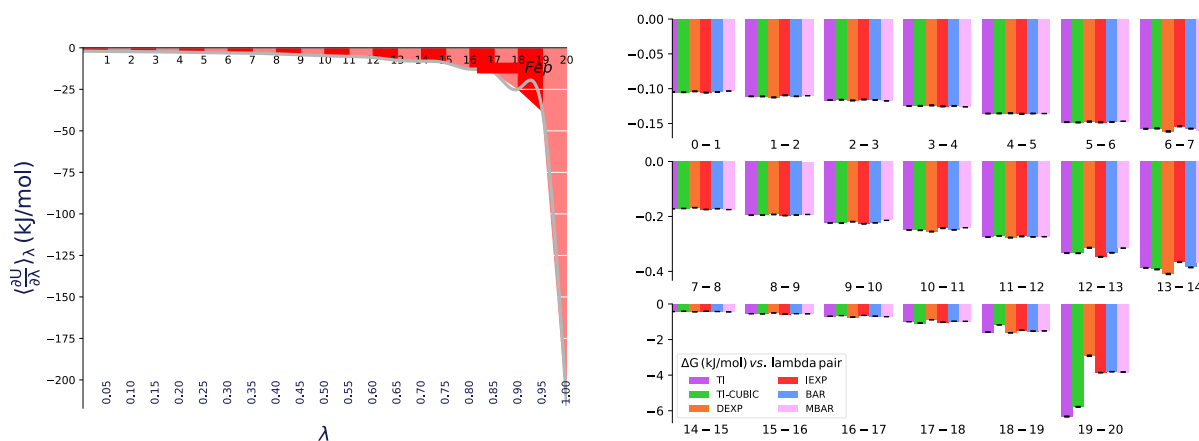

Figure S11: Left panel:  $\langle (\frac{\partial U(\lambda)}{\partial \lambda})_{\lambda_i} \rangle$  with respect to  $\lambda$  in the step (c): the annihilations of restraint on CMPO. Right panel:  $\Delta G$  with respect to each window.

| $\lambda$ | 0   | 1   | 2   | 3   | 4   | 5   | 6   | 7   | 8   | 9   | 10  | 11  | 12  | 13  | 14  | 15  | 16  | 17  | 18  | 19  | 20  |     |
|-----------|-----|-----|-----|-----|-----|-----|-----|-----|-----|-----|-----|-----|-----|-----|-----|-----|-----|-----|-----|-----|-----|-----|
| 0         | .07 | .07 | .07 | .06 | .06 | .06 | .06 | .06 | .06 | .06 | .05 | .05 | .05 | .05 | .04 | .04 | .03 | .03 | .02 | .01 |     |     |
| 1         | .07 | .07 | .06 | .06 | .06 | .06 | .06 | .06 | .06 | .06 | .05 | .05 | .05 | .05 | .04 | .04 | .03 | .03 | .02 | .01 |     |     |
| 2         | .07 | .06 | .06 | .06 | .06 | .06 | .06 | .06 | .06 | .06 | .05 | .05 | .05 | .05 | .04 | .04 | .03 | .03 | .02 | .01 |     |     |
| 3         | .06 | .06 | .06 | .06 | .06 | .06 | .06 | .06 | .06 | .06 | .05 | .05 | .05 | .05 | .04 | .04 | .03 | .03 | .02 | .01 |     |     |
| 4         | .06 | .06 | .06 | .06 | .06 | .06 | .06 | .06 | .06 | .06 | .05 | .05 | .05 | .05 | .04 | .04 | .04 | .03 | .02 | .02 |     |     |
| 5         | .06 | .06 | .06 | .06 | .06 | .06 | .06 | .06 | .06 | .06 | .05 | .05 | .05 | .05 | .04 | .04 | .04 | .03 | .02 | .02 |     |     |
| 6         | .06 | .06 | .06 | .06 | .06 | .06 | .06 | .06 | .06 | .06 | .05 | .05 | .05 | .05 | .05 | .04 | .04 | .03 | .03 | .02 | .01 |     |
| 7         | .06 | .06 | .06 | .06 | .06 | .06 | .06 | .06 | .06 | .06 | .05 | .05 | .05 | .05 | .05 | .04 | .04 | .03 | .03 | .02 | .01 |     |
| 8         | .06 | .06 | .06 | .06 | .06 | .06 | .06 | .06 | .06 | .05 | .05 | .05 | .05 | .05 | .05 | .04 | .04 | .04 | .03 | .02 | .01 |     |
| 9         | .06 | .06 | .06 | .06 | .06 | .06 | .06 | .06 | .05 | .05 | .05 | .05 | .05 | .05 | .05 | .05 | .04 | .04 | .03 | .02 | .01 |     |
| 10        | .05 | .05 | .05 | .05 | .05 | .05 | .05 | .05 | .05 | .05 | .05 | .05 | .05 | .05 | .05 | .05 | .04 | .04 | .03 | .02 | .01 |     |
| 11        | .05 | .05 | .05 | .05 | .05 | .05 | .05 | .05 | .05 | .05 | .05 | .05 | .05 | .05 | .05 | .05 | .05 | .04 | .04 | .03 | .01 |     |
| 12        | .05 | .05 | .05 | .05 | .05 | .05 | .05 | .05 | .05 | .05 | .05 | .05 | .05 | .05 | .05 | .05 | .05 | .05 | .04 | .03 | .01 |     |
| 13        | .05 | .05 | .05 | .05 | .05 | .05 | .05 | .05 | .05 | .05 | .05 | .05 | .05 | .05 | .05 | .05 | .05 | .05 | .05 | .04 | .01 |     |
| 14        | .04 | .04 | .04 | .04 | .04 | .04 | .05 | .05 | .05 | .05 | .05 | .05 | .05 | .05 | .05 | .06 | .06 | .06 | .06 | .05 | .04 | .02 |
| 15        | .04 | .04 | .04 | .04 | .04 | .04 | .04 | .04 | .04 | .05 | .05 | .05 | .05 | .05 | .05 | .06 | .06 | .06 | .06 | .06 | .05 | .02 |
| 16        | .03 | .03 | .03 | .03 | .04 | .04 | .04 | .04 | .04 | .04 | .04 | .05 | .05 | .05 | .05 | .06 | .06 | .07 | .07 | .07 | .07 | .03 |
| 17        | .03 | .03 | .03 | .03 | .03 | .03 | .03 | .03 | .04 | .04 | .04 | .04 | .05 | .05 | .06 | .06 | .07 | .08 | .09 | .09 | .05 |     |
| 18        | .02 | .02 | .02 | .02 | .02 | .02 | .03 | .03 | .03 | .03 | .03 | .04 | .04 | .05 | .05 | .06 | .07 | .09 | .11 | .13 | .08 |     |
| 19        | .01 | .01 | .01 | .01 | .02 | .02 | .02 | .02 | .02 | .02 | .02 | .03 | .03 | .04 | .04 | .05 | .07 | .09 | .13 | .18 | .16 |     |
| 20        |     |     |     |     |     |     | .01 | .01 | .01 | .01 | .01 | .01 | .01 | .01 | .02 | .02 | .03 | .05 | .08 | .16 | .55 |     |

Figure S12: Overlap matrix of phasing-out the bias potential on CMPO. Darker shades correspond to higher probabilities.

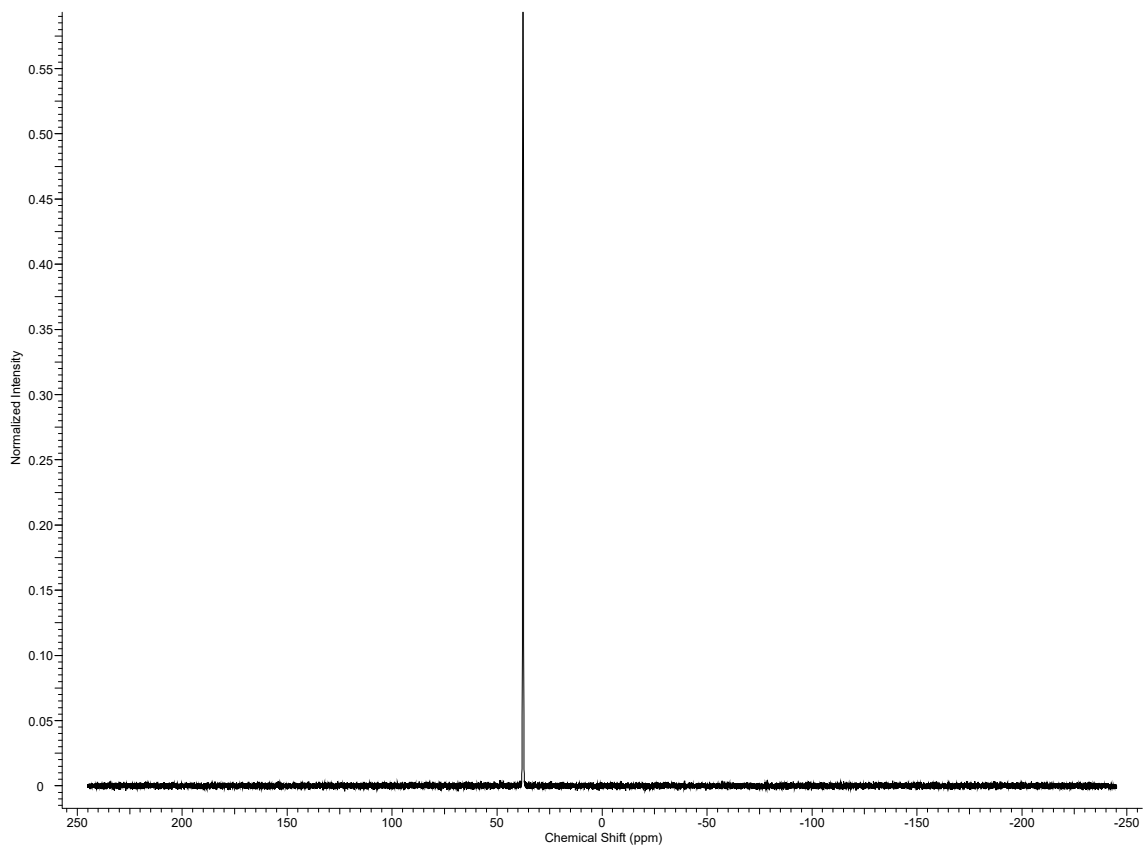

Figure S13: NMR spectra of CMPO in  $\text{CDCl}_3$  were obtained using a Bruker Avance III 300 spectrometer (300 MHz,  $^1\text{H}$ ; 282.3 MHz,  $^{19}\text{F}$ ; 121.4 MHz,  $^{31}\text{P}$ ). Chemical shifts ( $\delta$ ) are reported in parts per million (ppm) relative to tetramethylsilane.

## References

- (1) Tkac, P.; Vandegrift, G. F.; Lumetta, G. J.; Gelis, A. V. Study of the interaction between HDEHP and CMPO and its effect on the extraction of selected lanthanides. *Industrial & Engineering Chemistry Research* **2012**, *51*, 10433–10444.
